# Supplementary material for: Nucleation control and separation of vanillin polymorphs I and II through the swift cooling crystallization process
Source: Royal Society of Chemistry journal article supplement (doi:10.1039/d0ce01557a), 2021-01-01
Supplement: d0ce01557a1.pdf [file d0ce01557a1.pdf]

## Supplementary Information

### Nucleation control and separation of vanillin polymorphs I and II through Swift cooling crystallization process

*Sundareswaran Supriya and Karuppannan Srinivasan\**

Crystal Growth Laboratory, Department of Physics, School of Physical Sciences, Bharathiar University,  
Coimbatore-641046, Tamil Nadu, India.

**Table S1: Data collection conditions and results of SCXRD analysis of vanillin polymorphs**

| Identification Code                    | Form-I <sup>17</sup>                                                                             | Form-II                                                                                  |
|----------------------------------------|--------------------------------------------------------------------------------------------------|------------------------------------------------------------------------------------------|
| <b>Chemical formula</b>                | C <sub>8</sub> H <sub>8</sub> O <sub>3</sub>                                                     | C <sub>8</sub> H <sub>8</sub> O <sub>3</sub>                                             |
| <b>Formula weight</b>                  | 152.14 g/mol                                                                                     | 152.14 g/mol                                                                             |
| <b>Temperature</b>                     | 296(2) K                                                                                         | 296(2) K                                                                                 |
| <b>Wavelength</b>                      | 0.71073 Å                                                                                        | 0.71073 Å                                                                                |
| <b>Crystal size</b>                    | 0.200 x 0.200 x 0.300 mm                                                                         | 0.100 x 0.100 x 0.300 mm                                                                 |
| <b>Crystal habit</b>                   | clear intense white PLATY                                                                        | clear intense white NEEDLE                                                               |
| <b>Crystal system</b>                  | Monoclinic                                                                                       | Orthorhombic                                                                             |
| <b>Space group</b>                     | P 2 <sub>1</sub>                                                                                 | P n a 2 <sub>1</sub>                                                                     |
| <b>Unit cell dimensions</b>            | a = 14.0276(8) Å<br>b = 7.8650(4) Å<br>c = 14.9871(8) Å<br>α = 90°<br>β = 115.475(2)°<br>γ = 90° | a = 16.4359(13) Å<br>b = 3.8887(3) Å<br>c = 45.843(4) Å<br>α = 90°<br>β = 90°<br>γ = 90° |
| <b>Volume</b>                          | 1492.72(14) Å <sup>3</sup>                                                                       | 2930.0(4) Å <sup>3</sup>                                                                 |
| <b>Z</b>                               | 8                                                                                                | 16                                                                                       |
| <b>Density (calculated)</b>            | 1.354 g/cm <sup>3</sup>                                                                          | 1.380 g/cm <sup>3</sup>                                                                  |
| <b>Absorption coefficient</b>          | 0.104 mm <sup>-1</sup>                                                                           | 0.106 mm <sup>-1</sup>                                                                   |
| <b>F(000)</b>                          | 640                                                                                              | 1280                                                                                     |
| <b>Theta range for data collection</b> | 2.63 to 27.19°                                                                                   | 2.48 to 27.13°                                                                           |
| <b>Index ranges</b>                    | -18<=h<=18,-10<=k<=10,-                                                                          | -21<=h<=21, -4<=k<=4, -                                                                  |
| <b>Reflections collected</b>           | 19<=l<=19                                                                                        | 58<=l<=58                                                                                |
| <b>Independent reflections</b>         | 43087                                                                                            | 75071                                                                                    |
| <b>Absorption correction</b>           | 6592 [R(int) = 0.0446]                                                                           | 6393 [R(int) = 0.1905]                                                                   |
| <b>Max. and min. transmission</b>      | multi-scan                                                                                       | multi-scan                                                                               |
| <b>Refinement method</b>               | 0.9790 and 0.9690                                                                                | 0.9890 and 0.9690                                                                        |
| <b>Refinement program</b>              | Full-matrix least-squares on F2<br>SHELXL-2016/6 (Sheldrick, 2016)                               | Full-matrix least-squares on F2<br>SHELXL-2016/6 (Sheldrick, 2016)                       |
| <b>Data/restraints/ parameters</b>     | 6592 / 1 / 406                                                                                   | 6393 / 1 / 406                                                                           |
| <b>Goodness-of-fit on F2</b>           | 1.105                                                                                            | 1.014                                                                                    |
| <b>Final R indices I&gt;2σ(I)</b>      | R1 = 0.0457, wR2 = 0.1072                                                                        | R1 = 0.0597, wR2 = 0.0845                                                                |
| <b>R for all</b>                       | R1 = 0.0633, wR2 = 0.1137                                                                        | R1 = 0.1558, wR2 = 0.1040                                                                |
| <b>Extinction coefficient</b>          | 0.0250(20)                                                                                       | 0.0044(5)                                                                                |
| <b>Largest diff. peak and hole</b>     | 0.184 and -0.177 eÅ <sup>-3</sup>                                                                | 0.155 and -0.156 eÅ <sup>-3</sup>                                                        |
| <b>Reference</b>                       | CCDC-1948418                                                                                     | CCDC-1990284                                                                             |

## Form-I (CCDC-1948418)

**Table S2: Atomic coordinates and equivalent isotropic atomic displacement parameters ( $\text{\AA}^2$ )**

U(eq) is defined as one third of the trace of the orthogonalized  $U_{ij}$  tensor.

|            | x/a         | y/b       | z/c         | U(eq)      |
|------------|-------------|-----------|-------------|------------|
| <b>O3</b>  | 0.18272(16) | 0.0873(3) | 0.77753(14) | 0.0488(6)  |
| <b>O9</b>  | 0.79955(16) | 0.1421(3) | 0.27477(14) | 0.0502(6)  |
| <b>O2</b>  | 0.05881(16) | 0.1027(4) | 0.58379(15) | 0.0570(6)  |
| <b>O8</b>  | 0.71468(18) | 0.0617(4) | 0.08350(16) | 0.0607(7)  |
| <b>O6</b>  | 0.63785(16) | 0.6092(3) | 0.69675(15) | 0.0563(6)  |
| <b>O5</b>  | 0.70716(18) | 0.5730(4) | 0.89226(16) | 0.0633(7)  |
| <b>O12</b> | 0.26410(18) | 0.6527(4) | 0.19431(15) | 0.0614(7)  |
| <b>O4</b>  | 0.95543(19) | 0.9139(4) | 0.66826(18) | 0.0653(7)  |
| <b>O1</b>  | 0.52626(19) | 0.3898(4) | 0.8080(2)   | 0.0673(7)  |
| <b>O10</b> | 0.91447(19) | 0.9405(4) | 0.1608(2)   | 0.0690(7)  |
| <b>O7</b>  | 0.4924(2)   | 0.4724(4) | 0.3086(2)   | 0.0706(8)  |
| <b>O11</b> | 0.3770(2)   | 0.6351(5) | 0.38884(18) | 0.0785(9)  |
| <b>C5</b>  | 0.1565(2)   | 0.1689(4) | 0.6198(2)   | 0.0409(7)  |
| <b>C29</b> | 0.6584(2)   | 0.1522(4) | 0.1203(2)   | 0.0436(7)  |
| <b>C3</b>  | 0.3224(2)   | 0.2371(4) | 0.7551(2)   | 0.0406(7)  |
| <b>C30</b> | 0.6986(2)   | 0.1959(4) | 0.2205(2)   | 0.0398(7)  |
| <b>C6</b>  | 0.1899(3)   | 0.2428(5) | 0.5548(2)   | 0.0520(8)  |
| <b>C31</b> | 0.6377(2)   | 0.2853(4) | 0.2548(2)   | 0.0420(7)  |
| <b>C4</b>  | 0.2244(2)   | 0.1655(4) | 0.7217(2)   | 0.0374(6)  |
| <b>C13</b> | 0.7685(2)   | 0.6485(4) | 0.8557(2)   | 0.0455(7)  |
| <b>C15</b> | 0.8015(2)   | 0.7495(4) | 0.7204(2)   | 0.0432(7)  |
| <b>C2</b>  | 0.3562(2)   | 0.3102(4) | 0.6886(2)   | 0.0462(7)  |
| <b>C10</b> | 0.9008(2)   | 0.8070(4) | 0.7872(2)   | 0.0470(8)  |
| <b>C14</b> | 0.7360(2)   | 0.6715(4) | 0.7539(2)   | 0.0407(7)  |
| <b>C21</b> | 0.2803(3)   | 0.7030(5) | 0.3525(2)   | 0.0526(8)  |
| <b>C20</b> | 0.2176(2)   | 0.7154(4) | 0.2495(2)   | 0.0454(7)  |
| <b>C19</b> | 0.1192(2)   | 0.7861(4) | 0.2150(2)   | 0.0452(7)  |
| <b>C8</b>  | 0.2461(3)   | 0.0842(5) | 0.8819(2)   | 0.0554(9)  |
| <b>C26</b> | 0.5358(2)   | 0.3338(4) | 0.1899(3)   | 0.0487(8)  |
| <b>C27</b> | 0.4971(2)   | 0.2938(5) | 0.0911(3)   | 0.0559(9)  |
| <b>C18</b> | 0.0810(3)   | 0.8459(4) | 0.2819(3)   | 0.0470(8)  |
| <b>C23</b> | 0.1429(3)   | 0.8336(5) | 0.3821(3)   | 0.0599(10) |
| <b>C28</b> | 0.5576(3)   | 0.2035(5) | 0.0556(2)   | 0.0567(9)  |
| <b>C7</b>  | 0.2896(3)   | 0.3127(5) | 0.5895(3)   | 0.0556(9)  |
| <b>C1</b>  | 0.4611(3)   | 0.3862(5) | 0.7243(3)   | 0.0594(9)  |
| <b>C32</b> | 0.8466(3)   | 0.1821(5) | 0.3768(2)   | 0.0556(9)  |
| <b>C22</b> | 0.2419(3)   | 0.7652(6) | 0.4163(3)   | 0.0649(11) |
| <b>C16</b> | 0.5956(3)   | 0.6406(6) | 0.5930(2)   | 0.0710(12) |

|            | <b>x/a</b> | <b>y/b</b> | <b>z/c</b> | <b>U(eq)</b> |
|------------|------------|------------|------------|--------------|
| <b>C12</b> | 0.8664(3)  | 0.7073(5)  | 0.9209(2)  | 0.0615(10)   |
| <b>C9</b>  | 0.9722(3)  | 0.8903(5)  | 0.7532(3)  | 0.0593(9)    |
| <b>C17</b> | 0.9759(3)  | 0.9206(5)  | 0.2462(3)  | 0.0585(9)    |
| <b>C25</b> | 0.4689(3)  | 0.4296(5)  | 0.2247(3)  | 0.0586(9)    |
| <b>C11</b> | 0.9320(3)  | 0.7863(6)  | 0.8871(2)  | 0.0627(10)   |
| <b>C24</b> | 0.2067(3)  | 0.6658(6)  | 0.0891(2)  | 0.0707(11)   |

**Table S3: Bond lengths (Å)**

|                 |          |                 |          |
|-----------------|----------|-----------------|----------|
| <b>O3-C4</b>    | 1.356(3) | <b>O3-C8</b>    | 1.428(3) |
| <b>O9-C30</b>   | 1.362(3) | <b>O9-C32</b>   | 1.416(4) |
| <b>O2-C5</b>    | 1.344(4) | <b>O2-H2</b>    | 0.82     |
| <b>O8-C29</b>   | 1.345(4) | <b>O8-H8</b>    | 0.82     |
| <b>O6-C14</b>   | 1.362(3) | <b>O6-C16</b>   | 1.427(4) |
| <b>O5-C13</b>   | 1.341(4) | <b>O5-H5</b>    | 0.82     |
| <b>O12-C20</b>  | 1.347(4) | <b>O12-C24</b>  | 1.433(4) |
| <b>O4-C9</b>    | 1.205(4) | <b>O1-C1</b>    | 1.193(4) |
| <b>O10-C17</b>  | 1.207(4) | <b>O7-C25</b>   | 1.202(5) |
| <b>O11-C21</b>  | 1.336(4) | <b>O11-H11</b>  | 0.82     |
| <b>C5-C6</b>    | 1.378(4) | <b>C5-C4</b>    | 1.410(4) |
| <b>C29-C28</b>  | 1.387(4) | <b>C29-C30</b>  | 1.401(4) |
| <b>C3-C4</b>    | 1.366(4) | <b>C3-C2</b>    | 1.398(4) |
| <b>C3-H3</b>    | 0.93     | <b>C30-C31</b>  | 1.366(4) |
| <b>C6-C7</b>    | 1.380(5) | <b>C6-H6</b>    | 0.93     |
| <b>C31-C26</b>  | 1.393(4) | <b>C31-H31</b>  | 0.93     |
| <b>C13-C12</b>  | 1.379(4) | <b>C13-C14</b>  | 1.404(4) |
| <b>C15-C14</b>  | 1.367(4) | <b>C15-C10</b>  | 1.395(4) |
| <b>C15-H15</b>  | 0.93     | <b>C2-C7</b>    | 1.374(5) |
| <b>C2-C1</b>    | 1.460(5) | <b>C10-C11</b>  | 1.377(5) |
| <b>C10-C9</b>   | 1.460(5) | <b>C21-C22</b>  | 1.374(5) |
| <b>C21-C20</b>  | 1.414(4) | <b>C20-C19</b>  | 1.368(4) |
| <b>C19-C18</b>  | 1.405(4) | <b>C19-H19</b>  | 0.93     |
| <b>C8-H8A</b>   | 0.96     | <b>C8-H8B</b>   | 0.96     |
| <b>C8-H8C</b>   | 0.96     | <b>C26-C27</b>  | 1.376(5) |
| <b>C26-C25</b>  | 1.464(5) | <b>C27-C28</b>  | 1.376(5) |
| <b>C27-H27</b>  | 0.93     | <b>C18-C23</b>  | 1.377(5) |
| <b>C18-C17</b>  | 1.458(5) | <b>C23-C22</b>  | 1.367(5) |
| <b>C23-H23</b>  | 0.93     | <b>C28-H28</b>  | 0.93     |
| <b>C7-H7</b>    | 0.93     | <b>C1-H1</b>    | 0.93     |
| <b>C32-H32A</b> | 0.96     | <b>C32-H32B</b> | 0.96     |
| <b>C32-H32C</b> | 0.96     | <b>C22-H22</b>  | 0.93     |
| <b>C16-H16A</b> | 0.96     | <b>C16-H16B</b> | 0.96     |
| <b>C16-H16C</b> | 0.96     | <b>C12-C11</b>  | 1.375(5) |
| <b>C12-H12</b>  | 0.93     | <b>C9-H9</b>    | 0.93     |
| <b>C17-H17</b>  | 0.93     | <b>C25-H25</b>  | 0.93     |
| <b>C11-H11A</b> | 0.93     | <b>C24-H24A</b> | 0.96     |

**Table S4: Bond angles (°)**

|               |          |               |          |
|---------------|----------|---------------|----------|
| C4-O3-C8      | 116.9(2) | C30-O9-C32    | 117.2(2) |
| C5-O2-H2      | 109.5    | C29-O8-H8     | 109.5    |
| C14-O6-C16    | 117.1(2) | C13-O5-H5     | 109.5    |
| C20-O12-C24   | 117.2(3) | C21-O11-H11   | 109.5    |
| O2-C5-C6      | 118.5(3) | O2-C5-C4      | 121.7(3) |
| C6-C5-C4      | 119.9(3) | O8-C29-C28    | 118.0(3) |
| O8-C29-C30    | 122.2(3) | C28-C29-C30   | 119.8(3) |
| C4-C3-C2      | 120.4(3) | C4-C3-H3      | 119.8    |
| C2-C3-H3      | 119.8    | O9-C30-C31    | 126.4(3) |
| O9-C30-C29    | 113.5(3) | C31-C30-C29   | 120.1(3) |
| C5-C6-C7      | 119.9(3) | C5-C6-H6      | 120.0    |
| C7-C6-H6      | 120.0    | C30-C31-C26   | 119.9(3) |
| C30-C31-H31   | 120.1    | C26-C31-H31   | 120.1    |
| O3-C4-C3      | 126.4(3) | O3-C4-C5      | 114.0(2) |
| C3-C4-C5      | 119.5(3) | O5-C13-C12    | 118.5(3) |
| O5-C13-C14    | 122.4(3) | C12-C13-C14   | 119.0(3) |
| C14-C15-C10   | 120.2(3) | C14-C15-H15   | 119.9    |
| C10-C15-H15   | 119.9    | C7-C2-C3      | 119.7(3) |
| C7-C2-C1      | 119.9(3) | C3-C2-C1      | 120.4(3) |
| C11-C10-C15   | 119.6(3) | C11-C10-C9    | 119.2(3) |
| C15-C10-C9    | 121.2(3) | O6-C14-C15    | 126.0(3) |
| O6-C14-C13    | 113.8(3) | C15-C14-C13   | 120.1(3) |
| O11-C21-C22   | 119.5(3) | O11-C21-C20   | 121.2(3) |
| C22-C21-C20   | 119.4(3) | O12-C20-C19   | 126.4(3) |
| O12-C20-C21   | 114.1(3) | C19-C20-C21   | 119.5(3) |
| C20-C19-C18   | 120.0(3) | C20-C19-H19   | 120.0    |
| C18-C19-H19   | 120.0    | O3-C8-H8A     | 109.5    |
| O3-C8-H8B     | 109.5    | H8A-C8-H8B    | 109.5    |
| O3-C8-H8C     | 109.5    | H8A-C8-H8C    | 109.5    |
| H8B-C8-H8C    | 109.5    | C27-C26-C31   | 120.0(3) |
| C27-C26-C25   | 119.0(3) | C31-C26-C25   | 121.0(3) |
| C26-C27-C28   | 120.7(3) | C26-C27-H27   | 119.7    |
| C28-C27-H27   | 119.7    | C23-C18-C19   | 120.0(3) |
| C23-C18-C17   | 119.5(3) | C19-C18-C17   | 120.5(3) |
| C22-C23-C18   | 119.9(3) | C22-C23-H23   | 120.0    |
| C18-C23-H23   | 120.0    | C27-C28-C29   | 119.5(3) |
| C27-C28-H28   | 120.2    | C29-C28-H28   | 120.2    |
| C2-C7-C6      | 120.6(3) | C2-C7-H7      | 119.7    |
| C6-C7-H7      | 119.7    | O1-C1-C2      | 126.2(4) |
| O1-C1-H1      | 116.9    | C2-C1-H1      | 116.9    |
| O9-C32-H32A   | 109.5    | O9-C32-H32B   | 109.5    |
| H32A-C32-H32B | 109.5    | O9-C32-H32C   | 109.5    |
| H32A-C32-H32C | 109.5    | H32B-C32-H32C | 109.5    |

|                      |          |                      |          |
|----------------------|----------|----------------------|----------|
| <b>C23-C22-C21</b>   | 121.2(3) | <b>C23-C22-H22</b>   | 119.4    |
| <b>C21-C22-H22</b>   | 119.4    | <b>O6-C16-H16A</b>   | 109.5    |
| <b>O6-C16-H16B</b>   | 109.5    | <b>H16A-C16-H16B</b> | 109.5    |
| <b>O6-C16-H16C</b>   | 109.5    | <b>H16A-C16-H16C</b> | 109.5    |
| <b>H16B-C16-H16C</b> | 109.5    | <b>C11-C12-C13</b>   | 120.8(3) |
| <b>C11-C12-H12</b>   | 119.6    | <b>C13-C12-H12</b>   | 119.6    |
| <b>O4-C9-C10</b>     | 125.9(3) | <b>O4-C9-H9</b>      | 117.0    |
| <b>C10-C9-H9</b>     | 117.0    | <b>O10-C17-C18</b>   | 126.2(3) |
| <b>O10-C17-H17</b>   | 116.9    | <b>C18-C17-H17</b>   | 116.9    |
| <b>O7-C25-C26</b>    | 125.9(3) | <b>O7-C25-H25</b>    | 117.0    |
| <b>C26-C25-H25</b>   | 117.0    | <b>C12-C11-C10</b>   | 120.2(3) |
| <b>C12-C11-H11A</b>  | 119.9    | <b>C10-C11-H11A</b>  | 119.9    |
| <b>O12-C24-H24A</b>  | 109.5    | <b>O12-C24-H24B</b>  | 109.5    |
| <b>H24A-C24-H24B</b> | 109.5    | <b>O12-C24-H24C</b>  | 109.5    |
| <b>H24A-C24-H24C</b> | 109.5    | <b>H24B-C24-H24C</b> | 109.5    |

**Table S5: Torsion angles (°)**

|                        |           |                        |           |
|------------------------|-----------|------------------------|-----------|
| <b>C32-O9-C30-C31</b>  | 0.1(5)    | <b>C32-O9-C30-C29</b>  | 179.6(3)  |
| <b>O8-C29-C30-O9</b>   | 1.7(4)    | <b>C28-C29-C30-O9</b>  | -177.9(3) |
| <b>O8-C29-C30-C31</b>  | -178.8(3) | <b>C28-C29-C30-C31</b> | 1.6(5)    |
| <b>O2-C5-C6-C7</b>     | 179.7(3)  | <b>C4-C5-C6-C7</b>     | 0.2(5)    |
| <b>O9-C30-C31-C26</b>  | 179.1(3)  | <b>C29-C30-C31-C26</b> | -0.4(5)   |
| <b>C8-O3-C4-C3</b>     | 2.1(5)    | <b>C8-O3-C4-C5</b>     | -178.0(3) |
| <b>C2-C3-C4-O3</b>     | 178.5(3)  | <b>C2-C3-C4-C5</b>     | -1.3(5)   |
| <b>O2-C5-C4-O3</b>     | 1.3(4)    | <b>C6-C5-C4-O3</b>     | -179.2(3) |
| <b>O2-C5-C4-C3</b>     | -178.9(3) | <b>C6-C5-C4-C3</b>     | 0.7(5)    |
| <b>C4-C3-C2-C7</b>     | 1.2(5)    | <b>C4-C3-C2-C1</b>     | -179.8(3) |
| <b>C14-C15-C10-C11</b> | -0.7(5)   | <b>C14-C15-C10-C9</b>  | 179.8(3)  |
| <b>C16-O6-C14-C15</b>  | -5.6(5)   | <b>C16-O6-C14-C13</b>  | 174.8(3)  |
| <b>C10-C15-C14-O6</b>  | -179.7(3) | <b>C10-C15-C14-C13</b> | -0.1(5)   |
| <b>O5-C13-C14-O6</b>   | -0.5(5)   | <b>C12-C13-C14-O6</b>  | -179.7(3) |
| <b>O5-C13-C14-C15</b>  | 179.9(3)  | <b>C12-C13-C14-C15</b> | 0.7(5)    |
| <b>C24-O12-C20-C19</b> | 2.2(6)    | <b>C24-O12-C20-C21</b> | -178.1(3) |
| <b>O11-C21-C20-O12</b> | 0.4(5)    | <b>C22-C21-C20-O12</b> | 179.0(4)  |
| <b>O11-C21-C20-C19</b> | -179.8(4) | <b>C22-C21-C20-C19</b> | -1.3(6)   |
| <b>O12-C20-C19-C18</b> | 179.8(3)  | <b>C21-C20-C19-C18</b> | 0.1(5)    |
| <b>C30-C31-C26-C27</b> | -1.0(5)   | <b>C30-C31-C26-C25</b> | 180.0(3)  |
| <b>C31-C26-C27-C28</b> | 1.1(5)    | <b>C25-C26-C27-C28</b> | -179.8(3) |
| <b>C20-C19-C18-C23</b> | 0.2(5)    | <b>C20-C19-C18-C17</b> | -179.6(3) |

|                        |           |                        |           |
|------------------------|-----------|------------------------|-----------|
| <b>C19-C18-C23-C22</b> | 0.8(6)    | <b>C17-C18-C23-C22</b> | -179.4(4) |
| <b>C26-C27-C28-C29</b> | 0.1(6)    | <b>O8-C29-C28-C27</b>  | 178.9(3)  |
| <b>C30-C29-C28-C27</b> | -1.4(5)   | <b>C3-C2-C7-C6</b>     | -0.4(5)   |
| <b>C1-C2-C7-C6</b>     | -179.4(4) | <b>C5-C6-C7-C2</b>     | -0.3(6)   |
| <b>C7-C2-C1-O1</b>     | -178.8(4) | <b>C3-C2-C1-O1</b>     | 2.1(6)    |
| <b>C18-C23-C22-C21</b> | -2.1(6)   | <b>O11-C21-C22-C23</b> | -179.2(4) |
| <b>C20-C21-C22-C23</b> | 2.3(6)    | <b>O5-C13-C12-C11</b>  | -179.7(4) |
| <b>C14-C13-C12-C11</b> | -0.4(6)   | <b>C11-C10-C9-O4</b>   | 178.7(4)  |
| <b>C15-C10-C9-O4</b>   | -1.8(6)   | <b>C23-C18-C17-O10</b> | 179.1(4)  |
| <b>C19-C18-C17-O10</b> | -1.1(6)   | <b>C27-C26-C25-O7</b>  | 179.7(4)  |
| <b>C31-C26-C25-O7</b>  | -1.2(6)   | <b>C13-C12-C11-C10</b> | -0.3(6)   |
| <b>C15-C10-C11-C12</b> | 0.9(6)    | <b>C9-C10-C11-C12</b>  | -179.6(4) |

**Table S6: Anisotropic atomic displacement parameters (Å<sup>2</sup>)**

The anisotropic atomic displacement factor exponent takes the form:  $-2\pi^2 [ h^2 a^{*2} U_{11} + \dots + 2 h k a^* b^* U_{12} ]$

|            | <b>U<sub>11</sub></b> | <b>U<sub>22</sub></b> | <b>U<sub>33</sub></b> | <b>U<sub>23</sub></b> | <b>U<sub>13</sub></b> | <b>U<sub>12</sub></b> |
|------------|-----------------------|-----------------------|-----------------------|-----------------------|-----------------------|-----------------------|
| <b>O3</b>  | 0.0402(11)            | 0.0699(15)            | 0.0323(10)            | 0.0011(10)            | 0.0116(9)             | -0.0138(11)           |
| <b>O9</b>  | 0.0354(10)            | 0.0702(16)            | 0.0370(11)            | -0.0030(11)           | 0.0079(9)             | 0.0127(11)            |
| <b>O2</b>  | 0.0414(11)            | 0.0802(18)            | 0.0389(11)            | 0.0054(12)            | 0.0075(9)             | -0.0137(12)           |
| <b>O8</b>  | 0.0482(13)            | 0.0890(19)            | 0.0414(12)            | -0.0070(13)           | 0.0161(10)            | 0.0152(14)            |
| <b>O6</b>  | 0.0385(11)            | 0.0809(18)            | 0.0398(11)            | 0.0051(12)            | 0.0077(9)             | -0.0164(12)           |
| <b>O5</b>  | 0.0495(13)            | 0.094(2)              | 0.0436(12)            | 0.0036(13)            | 0.0177(10)            | -0.0216(14)           |
| <b>O12</b> | 0.0532(13)            | 0.0929(19)            | 0.0413(12)            | 0.0034(13)            | 0.0234(10)            | 0.0248(14)            |
| <b>O4</b>  | 0.0567(14)            | 0.0872(19)            | 0.0578(15)            | -0.0112(14)           | 0.0300(12)            | -0.0251(14)           |
| <b>O1</b>  | 0.0450(13)            | 0.0807(19)            | 0.0713(18)            | -0.0027(15)           | 0.0205(13)            | -0.0146(13)           |
| <b>O10</b> | 0.0458(13)            | 0.087(2)              | 0.0722(18)            | 0.0039(15)            | 0.0240(13)            | 0.0162(13)            |
| <b>O7</b>  | 0.0610(16)            | 0.074(2)              | 0.087(2)              | -0.0061(15)           | 0.0415(15)            | 0.0109(14)            |
| <b>O11</b> | 0.0560(15)            | 0.121(3)              | 0.0481(14)            | -0.0017(16)           | 0.0122(11)            | 0.0349(16)            |
| <b>C5</b>  | 0.0378(15)            | 0.0451(17)            | 0.0359(15)            | 0.0013(13)            | 0.0123(12)            | -0.0007(14)           |
| <b>C29</b> | 0.0393(15)            | 0.0497(19)            | 0.0396(15)            | 0.0017(14)            | 0.0148(13)            | 0.0037(14)            |
| <b>C3</b>  | 0.0371(15)            | 0.0435(17)            | 0.0371(15)            | -0.0007(13)           | 0.0120(12)            | -0.0005(13)           |
| <b>C30</b> | 0.0331(14)            | 0.0423(18)            | 0.0413(15)            | 0.0033(13)            | 0.0134(12)            | 0.0027(13)            |
| <b>C6</b>  | 0.0546(19)            | 0.061(2)              | 0.0336(15)            | 0.0031(15)            | 0.0129(14)            | -0.0054(17)           |
| <b>C31</b> | 0.0381(15)            | 0.0441(17)            | 0.0424(16)            | 0.0012(14)            | 0.0160(13)            | 0.0019(13)            |
| <b>C4</b>  | 0.0350(14)            | 0.0419(17)            | 0.0364(15)            | -0.0006(13)           | 0.0162(12)            | -0.0001(13)           |
| <b>C13</b> | 0.0382(15)            | 0.054(2)              | 0.0421(16)            | -0.0002(15)           | 0.0153(13)            | -0.0049(15)           |
| <b>C15</b> | 0.0390(15)            | 0.0500(19)            | 0.0399(15)            | -0.0016(14)           | 0.0163(13)            | -0.0012(14)           |
| <b>C2</b>  | 0.0411(16)            | 0.0454(18)            | 0.0563(19)            | -0.0023(15)           | 0.0249(15)            | -0.0024(14)           |
| <b>C10</b> | 0.0385(16)            | 0.055(2)              | 0.0473(18)            | -0.0017(15)           | 0.0181(14)            | -0.0067(15)           |
| <b>C14</b> | 0.0308(13)            | 0.0457(18)            | 0.0423(16)            | 0.0002(14)            | 0.0124(12)            | -0.0015(13)           |
| <b>C21</b> | 0.0444(17)            | 0.065(2)              | 0.0460(17)            | 0.0047(16)            | 0.0174(14)            | 0.0140(16)            |
| <b>C20</b> | 0.0393(15)            | 0.053(2)              | 0.0470(17)            | 0.0011(15)            | 0.0219(14)            | 0.0044(15)            |
| <b>C19</b> | 0.0420(16)            | 0.0504(19)            | 0.0434(17)            | 0.0026(15)            | 0.0186(14)            | 0.0021(15)            |

|            | <b>U<sub>11</sub></b> | <b>U<sub>22</sub></b> | <b>U<sub>33</sub></b> | <b>U<sub>23</sub></b> | <b>U<sub>13</sub></b> | <b>U<sub>12</sub></b> |
|------------|-----------------------|-----------------------|-----------------------|-----------------------|-----------------------|-----------------------|
| <b>C8</b>  | 0.0523(18)            | 0.076(3)              | 0.0304(15)            | 0.0049(16)            | 0.0107(13)            | -0.0095(18)           |
| <b>C26</b> | 0.0359(16)            | 0.0433(19)            | 0.068(2)              | 0.0020(16)            | 0.0232(15)            | 0.0026(14)            |
| <b>C27</b> | 0.0343(16)            | 0.059(2)              | 0.058(2)              | 0.0014(17)            | 0.0050(15)            | 0.0074(15)            |
| <b>C18</b> | 0.0423(16)            | 0.0485(19)            | 0.0565(19)            | 0.0012(15)            | 0.0270(15)            | 0.0020(14)            |
| <b>C23</b> | 0.063(2)              | 0.076(3)              | 0.053(2)              | -0.0032(18)           | 0.0367(18)            | 0.012(2)              |
| <b>C28</b> | 0.0474(18)            | 0.066(2)              | 0.0430(17)            | -0.0036(16)           | 0.0065(14)            | 0.0059(17)            |
| <b>C7</b>  | 0.064(2)              | 0.060(2)              | 0.0494(19)            | 0.0041(16)            | 0.0309(17)            | -0.0075(18)           |
| <b>C1</b>  | 0.0500(19)            | 0.066(2)              | 0.068(2)              | -0.0022(19)           | 0.0307(19)            | -0.0101(18)           |
| <b>C32</b> | 0.0469(18)            | 0.068(2)              | 0.0415(17)            | -0.0023(16)           | 0.0089(14)            | 0.0085(17)            |
| <b>C22</b> | 0.065(2)              | 0.090(3)              | 0.0411(18)            | 0.0029(19)            | 0.0245(16)            | 0.020(2)              |
| <b>C16</b> | 0.0511(19)            | 0.107(3)              | 0.0393(18)            | 0.002(2)              | 0.0042(15)            | -0.024(2)             |
| <b>C12</b> | 0.0497(18)            | 0.089(3)              | 0.0352(16)            | 0.0069(18)            | 0.0078(14)            | -0.0152(19)           |
| <b>C9</b>  | 0.0434(18)            | 0.076(3)              | 0.057(2)              | -0.0093(19)           | 0.0203(16)            | -0.0181(18)           |
| <b>C17</b> | 0.055(2)              | 0.058(2)              | 0.076(3)              | -0.002(2)             | 0.040(2)              | 0.0065(18)            |
| <b>C25</b> | 0.0417(18)            | 0.053(2)              | 0.080(3)              | 0.002(2)              | 0.0259(18)            | 0.0077(16)            |
| <b>C11</b> | 0.0388(17)            | 0.084(3)              | 0.0493(19)            | -0.0001(19)           | 0.0034(15)            | -0.0208(18)           |
| <b>C24</b> | 0.069(2)              | 0.101(3)              | 0.0454(19)            | 0.001(2)              | 0.0278(17)            | 0.020(2)              |

**Table S7: Hydrogen atomic coordinates and isotropic atomic displacement parameters (Å<sup>2</sup>)**

|            | <b>x/a</b> | <b>y/b</b> | <b>z/c</b> | <b>U(eq)</b> |
|------------|------------|------------|------------|--------------|
| <b>H2</b>  | 0.0498     | 0.0562     | 0.6285     | 0.085        |
| <b>H8</b>  | 0.7765     | 0.0574     | 0.1245     | 0.091        |
| <b>H5</b>  | 0.6549     | 0.5327     | 0.8468     | 0.095        |
| <b>H11</b> | 0.3886     | 0.5979     | 0.3433     | 0.118        |
| <b>H3</b>  | 0.3668     | 0.2372     | 0.8224     | 0.049        |
| <b>H6</b>  | 0.1452     | 0.2455     | 0.4876     | 0.062        |
| <b>H31</b> | 0.6643     | 0.3138     | 0.3214     | 0.05         |
| <b>H15</b> | 0.7798     | 0.7643     | 0.6529     | 0.052        |
| <b>H19</b> | 0.0775     | 0.7947     | 0.1473     | 0.054        |
| <b>H8A</b> | 0.3135     | 0.0345     | 0.8955     | 0.083        |
| <b>H8B</b> | 0.2114     | 0.0178     | 0.9129     | 0.083        |
| <b>H8C</b> | 0.2561     | 0.1982     | 0.9072     | 0.083        |
| <b>H27</b> | 0.4294     | 0.3282     | 0.0479     | 0.067        |
| <b>H23</b> | 0.1174     | 0.8718     | 0.4264     | 0.072        |
| <b>H28</b> | 0.5310     | 0.1771     | -0.0112    | 0.068        |
| <b>H7</b>  | 0.3120     | 0.3619     | 0.5453     | 0.067        |
| <b>H1</b>  | 0.4788     | 0.4365     | 0.6773     | 0.071        |

|             | <b>x/a</b> | <b>y/b</b> | <b>z/c</b> | <b>U(eq)</b> |
|-------------|------------|------------|------------|--------------|
| <b>H32A</b> | 0.8461     | 0.3031     | 0.3850     | 0.083        |
| <b>H32B</b> | 0.9181     | 0.1416     | 0.4063     | 0.083        |
| <b>H32C</b> | 0.8075     | 0.1286     | 0.4082     | 0.083        |
| <b>H22</b>  | 0.2840     | 0.7608     | 0.4840     | 0.078        |
| <b>H16A</b> | 0.5907     | 0.7610     | 0.5813     | 0.106        |
| <b>H16B</b> | 0.5266     | 0.5908     | 0.5608     | 0.106        |
| <b>H16C</b> | 0.6411     | 0.5912     | 0.5671     | 0.106        |
| <b>H12</b>  | 0.8884     | 0.6933     | 0.9885     | 0.074        |
| <b>H9</b>   | 1.0364     | 0.9286     | 0.8014     | 0.071        |
| <b>H17</b>  | -0.0458    | 0.9562     | 0.2937     | 0.07         |
| <b>H25</b>  | 0.4021     | 0.4602     | 0.1776     | 0.07         |
| <b>H11A</b> | 0.9977     | 0.8259     | 0.9319     | 0.075        |
| <b>H24A</b> | 0.1406     | 0.6069     | 0.0680     | 0.106        |
| <b>H24B</b> | 0.2473     | 0.6160     | 0.0581     | 0.106        |
| <b>H24C</b> | 0.1936     | 0.7834     | 0.0707     | 0.106        |

## Form-II (CCDC-1990284)

**Table S8: Atomic coordinates and equivalent isotropic atomic displacement parameters ( $\text{\AA}^2$ )**

U(eq) is defined as one third of the trace of the orthogonalized  $U_{ij}$  tensor.

|            | <b>x/a</b>  | <b>y/b</b> | <b>z/c</b>  | <b>U(eq)</b> |
|------------|-------------|------------|-------------|--------------|
| <b>O9</b>  | 0.18553(18) | 0.2395(10) | 0.53470(7)  | 0.0477(10)   |
| <b>O12</b> | 0.14976(18) | 0.1753(10) | 0.65851(7)  | 0.0539(11)   |
| <b>O3</b>  | 0.5972(2)   | 0.2564(9)  | 0.34097(7)  | 0.0497(10)   |
| <b>O5</b>  | 0.22561(18) | 0.7404(11) | 0.44957(8)  | 0.0541(11)   |
| <b>O6</b>  | 0.53826(18) | 0.7600(9)  | 0.46860(7)  | 0.0471(10)   |
| <b>O8</b>  | 0.49795(19) | 0.2922(11) | 0.55401(8)  | 0.0583(12)   |
| <b>O7</b>  | 0.12892(18) | 0.9620(11) | 0.58346(7)  | 0.0536(11)   |
| <b>O10</b> | 0.0216(2)   | 0.9057(12) | 0.63173(7)  | 0.0576(11)   |
| <b>O1</b>  | 0.7092(2)   | 0.9504(11) | 0.37369(7)  | 0.0565(11)   |
| <b>O4</b>  | 0.59579(18) | 0.0322(12) | 0.41984(7)  | 0.0552(12)   |
| <b>O11</b> | 0.0333(3)   | 0.4647(13) | 0.76201(8)  | 0.0776(14)   |
| <b>C22</b> | 0.2431(3)   | 0.1453(13) | 0.55449(10) | 0.0332(12)   |
| <b>C9</b>  | 0.5141(3)   | 0.0104(14) | 0.42371(11) | 0.0352(13)   |
| <b>C13</b> | 0.3990(3)   | 0.8354(13) | 0.45168(10) | 0.0361(13)   |
| <b>C21</b> | 0.3247(3)   | 0.1850(13) | 0.55179(10) | 0.0333(12)   |
| <b>C12</b> | 0.3485(3)   | 0.9588(13) | 0.42956(10) | 0.0324(13)   |
| <b>C10</b> | 0.4648(3)   | 0.1347(14) | 0.40222(10) | 0.0422(14)   |
| <b>C30</b> | 0.0786(3)   | 0.1612(14) | 0.67451(10) | 0.0394(14)   |
| <b>C14</b> | 0.4818(3)   | 0.8667(13) | 0.44873(10) | 0.0321(12)   |
| <b>C15</b> | 0.2604(3)   | 0.9063(15) | 0.43129(11) | 0.0397(14)   |
| <b>C25</b> | 0.0138(3)   | 0.0166(13) | 0.65968(11) | 0.0413(14)   |



|            | <b>x/a</b> | <b>y/b</b> | <b>z/c</b>  | <b>U(eq)</b> |
|------------|------------|------------|-------------|--------------|
| <b>C2</b>  | 0.7978(3)  | 0.8977(14) | 0.33407(10) | 0.0426(14)   |
| <b>C6</b>  | 0.6672(3)  | 0.1617(13) | 0.32716(11) | 0.0387(14)   |
| <b>O2</b>  | 0.7367(3)  | 0.2968(13) | 0.23852(8)  | 0.0857(16)   |
| <b>C20</b> | 0.3763(3)  | 0.0711(14) | 0.57377(10) | 0.0336(13)   |
| <b>C17</b> | 0.2104(3)  | 0.9955(14) | 0.57968(10) | 0.0362(13)   |
| <b>C23</b> | 0.4631(3)  | 0.1295(15) | 0.57283(11) | 0.0430(14)   |
| <b>C1</b>  | 0.7249(3)  | 0.0040(14) | 0.34498(10) | 0.0390(13)   |
| <b>C5</b>  | 0.6849(3)  | 0.2118(14) | 0.29813(11) | 0.0419(13)   |
| <b>C19</b> | 0.3439(3)  | 0.9123(14) | 0.59822(10) | 0.0420(14)   |
| <b>C4</b>  | 0.7588(3)  | 0.1036(14) | 0.28702(10) | 0.0420(13)   |
| <b>C3</b>  | 0.8156(3)  | 0.9461(14) | 0.30488(11) | 0.0438(14)   |
| <b>C11</b> | 0.3818(3)  | 0.1110(14) | 0.40541(10) | 0.0407(14)   |
| <b>C18</b> | 0.2612(3)  | 0.8744(14) | 0.60116(10) | 0.0409(13)   |
| <b>C16</b> | 0.5101(3)  | 0.6198(14) | 0.49535(10) | 0.0454(15)   |
| <b>C29</b> | 0.0699(3)  | 0.2693(13) | 0.70280(10) | 0.0420(14)   |
| <b>C24</b> | 0.2133(3)  | 0.3877(15) | 0.50792(10) | 0.0487(15)   |
| <b>C27</b> | 0.9304(3)  | 0.0869(15) | 0.70142(11) | 0.0496(15)   |
| <b>C28</b> | 0.9950(3)  | 0.2323(14) | 0.71629(10) | 0.0430(14)   |
| <b>C32</b> | 0.2210(3)  | 0.2982(17) | 0.67292(11) | 0.0569(17)   |
| <b>C26</b> | 0.9402(3)  | 0.9763(15) | 0.67288(11) | 0.0492(15)   |
| <b>C31</b> | 0.9825(4)  | 0.3454(17) | 0.74622(13) | 0.0638(19)   |
| <b>C7</b>  | 0.7797(4)  | 0.1570(17) | 0.25623(12) | 0.0589(17)   |
| <b>C8</b>  | 0.5348(3)  | 0.4141(16) | 0.32385(11) | 0.0584(17)   |

**Table S9: Bond lengths (Å)**

|                |          |                 |          |
|----------------|----------|-----------------|----------|
| <b>O9-C22</b>  | 1.362(5) | <b>O9-C24</b>   | 1.431(6) |
| <b>O12-C30</b> | 1.382(5) | <b>O12-C32</b>  | 1.427(5) |
| <b>O3-C6</b>   | 1.363(6) | <b>O3-C8</b>    | 1.430(5) |
| <b>O5-C15</b>  | 1.203(6) | <b>O6-C14</b>   | 1.365(5) |
| <b>O6-C16</b>  | 1.420(5) | <b>O8-C23</b>   | 1.214(6) |
| <b>O7-C17</b>  | 1.357(5) | <b>O7-H7</b>    | 0.82     |
| <b>O10-C25</b> | 1.358(5) | <b>O10-H10</b>  | 0.82     |
| <b>O1-C1</b>   | 1.358(5) | <b>O1-H1</b>    | 0.82     |
| <b>O4-C9</b>   | 1.357(5) | <b>O4-H4</b>    | 0.82     |
| <b>O11-C31</b> | 1.198(7) | <b>C22-C21</b>  | 1.355(6) |
| <b>C22-C17</b> | 1.401(7) | <b>C9-C10</b>   | 1.364(6) |
| <b>C9-C14</b>  | 1.381(6) | <b>C13-C14</b>  | 1.373(6) |
| <b>C13-C12</b> | 1.395(6) | <b>C13-H13</b>  | 0.93     |
| <b>C21-C20</b> | 1.390(6) | <b>C21-H21</b>  | 0.93     |
| <b>C12-C11</b> | 1.370(6) | <b>C12-C15</b>  | 1.464(7) |
| <b>C10-C11</b> | 1.375(7) | <b>C10-H10A</b> | 0.93     |
| <b>C30-C29</b> | 1.371(6) | <b>C30-C25</b>  | 1.382(6) |
| <b>C15-H15</b> | 0.93     | <b>C25-C26</b>  | 1.362(6) |
| <b>C2-C1</b>   | 1.362(6) | <b>C2-C3</b>    | 1.383(6) |
| <b>C2-H2</b>   | 0.93     | <b>C6-C5</b>    | 1.376(6) |

|                 |          |                 |          |
|-----------------|----------|-----------------|----------|
| <b>C6-C1</b>    | 1.395(7) | <b>O2-C7</b>    | 1.206(6) |
| <b>C20-C19</b>  | 1.386(6) | <b>C20-C23</b>  | 1.445(7) |
| <b>C17-C18</b>  | 1.374(6) | <b>C23-H23</b>  | 0.93     |
| <b>C5-C4</b>    | 1.382(7) | <b>C5-H5</b>    | 0.93     |
| <b>C19-C18</b>  | 1.374(6) | <b>C19-H19</b>  | 0.93     |
| <b>C4-C3</b>    | 1.384(7) | <b>C4-C7</b>    | 1.468(7) |
| <b>C3-H3</b>    | 0.93     | <b>C11-H11</b>  | 0.93     |
| <b>C18-H18</b>  | 0.93     | <b>C16-H16A</b> | 0.96     |
| <b>C16-H16B</b> | 0.96     | <b>C16-H16C</b> | 0.96     |
| <b>C29-C28</b>  | 1.386(6) | <b>C29-H29</b>  | 0.93     |
| <b>C24-H24A</b> | 0.96     | <b>C24-H24B</b> | 0.96     |
| <b>C24-H24C</b> | 0.96     | <b>C27-C28</b>  | 1.382(7) |
| <b>C27-C26</b>  | 1.386(7) | <b>C27-H27</b>  | 0.93     |
| <b>C28-C31</b>  | 1.455(7) | <b>C32-H32A</b> | 0.96     |
| <b>C32-H32B</b> | 0.96     | <b>C32-H32C</b> | 0.96     |
| <b>C26-H26</b>  | 0.93     | <b>C31-H31</b>  | 0.93     |
| <b>C7-H7A</b>   | 0.93     | <b>C8-H8A</b>   | 0.96     |
| <b>C8-H8B</b>   | 0.96     | <b>C8-H8C</b>   | 0.96     |

**Table S10: Bond angles (°)**

|                    |          |                     |          |
|--------------------|----------|---------------------|----------|
| <b>C22-O9-C24</b>  | 117.2(4) | <b>C30-O12-C32</b>  | 117.6(4) |
| <b>C6-O3-C8</b>    | 117.7(4) | <b>C14-O6-C16</b>   | 118.2(4) |
| <b>C17-O7-H7</b>   | 109.5    | <b>C25-O10-H10</b>  | 109.5    |
| <b>C1-O1-H1</b>    | 109.5    | <b>C9-O4-H4</b>     | 109.5    |
| <b>C21-C22-O9</b>  | 126.6(4) | <b>C21-C22-C17</b>  | 120.1(4) |
| <b>O9-C22-C17</b>  | 113.2(4) | <b>O4-C9-C10</b>    | 118.1(4) |
| <b>O4-C9-C14</b>   | 120.9(4) | <b>C10-C9-C14</b>   | 121.0(4) |
| <b>C14-C13-C12</b> | 119.2(4) | <b>C14-C13-H13</b>  | 120.4    |
| <b>C12-C13-H13</b> | 120.4    | <b>C22-C21-C20</b>  | 120.1(4) |
| <b>C22-C21-H21</b> | 119.9    | <b>C20-C21-H21</b>  | 119.9    |
| <b>C11-C12-C13</b> | 119.9(4) | <b>C11-C12-C15</b>  | 119.9(4) |
| <b>C13-C12-C15</b> | 120.1(4) | <b>C9-C10-C11</b>   | 119.2(5) |
| <b>C9-C10-H10A</b> | 120.4    | <b>C11-C10-H10A</b> | 120.4    |
| <b>C29-C30-O12</b> | 125.3(4) | <b>C29-C30-C25</b>  | 120.7(4) |
| <b>O12-C30-C25</b> | 114.0(4) | <b>O6-C14-C13</b>   | 125.5(4) |
| <b>O6-C14-C9</b>   | 114.6(4) | <b>C13-C14-C9</b>   | 119.9(4) |
| <b>O5-C15-C12</b>  | 125.7(5) | <b>O5-C15-H15</b>   | 117.2    |
| <b>C12-C15-H15</b> | 117.2    | <b>O10-C25-C26</b>  | 117.8(5) |
| <b>O10-C25-C30</b> | 121.4(4) | <b>C26-C25-C30</b>  | 120.8(5) |
| <b>C1-C2-C3</b>    | 120.0(5) | <b>C1-C2-H2</b>     | 120.0    |
| <b>C3-C2-H2</b>    | 120.0    | <b>O3-C6-C5</b>     | 126.2(5) |
| <b>O3-C6-C1</b>    | 114.9(4) | <b>C5-C6-C1</b>     | 119.0(5) |
| <b>C19-C20-C21</b> | 119.6(4) | <b>C19-C20-C23</b>  | 118.2(4) |
| <b>C21-C20-C23</b> | 122.1(4) | <b>O7-C17-C18</b>   | 118.4(4) |
| <b>O7-C17-C22</b>  | 121.6(4) | <b>C18-C17-C22</b>  | 120.0(4) |
| <b>O8-C23-C20</b>  | 124.7(5) | <b>O8-C23-H23</b>   | 117.6    |

|                      |          |                      |          |
|----------------------|----------|----------------------|----------|
| <b>C20-C23-H23</b>   | 117.6    | <b>O1-C1-C2</b>      | 118.5(5) |
| <b>O1-C1-C6</b>      | 120.4(4) | <b>C2-C1-C6</b>      | 121.1(5) |
| <b>C6-C5-C4</b>      | 120.0(5) | <b>C6-C5-H5</b>      | 120.0    |
| <b>C4-C5-H5</b>      | 120.0    | <b>C18-C19-C20</b>   | 120.5(4) |
| <b>C18-C19-H19</b>   | 119.8    | <b>C20-C19-H19</b>   | 119.8    |
| <b>C5-C4-C3</b>      | 120.6(5) | <b>C5-C4-C7</b>      | 121.1(5) |
| <b>C3-C4-C7</b>      | 118.3(5) | <b>C2-C3-C4</b>      | 119.3(5) |
| <b>C2-C3-H3</b>      | 120.3    | <b>C4-C3-H3</b>      | 120.3    |
| <b>C12-C11-C10</b>   | 120.8(4) | <b>C12-C11-H11</b>   | 119.6    |
| <b>C10-C11-H11</b>   | 119.6    | <b>C17-C18-C19</b>   | 119.6(4) |
| <b>C17-C18-H18</b>   | 120.2    | <b>C19-C18-H18</b>   | 120.2    |
| <b>O6-C16-H16A</b>   | 109.5    | <b>O6-C16-H16B</b>   | 109.5    |
| <b>H16A-C16-H16B</b> | 109.5    | <b>O6-C16-H16C</b>   | 109.5    |
| <b>H16A-C16-H16C</b> | 109.5    | <b>H16B-C16-H16C</b> | 109.5    |
| <b>C30-C29-C28</b>   | 118.9(5) | <b>C30-C29-H29</b>   | 120.6    |
| <b>C28-C29-H29</b>   | 120.6    | <b>O9-C24-H24A</b>   | 109.5    |
| <b>O9-C24-H24B</b>   | 109.5    | <b>H24A-C24-H24B</b> | 109.5    |
| <b>O9-C24-H24C</b>   | 109.5    | <b>H24A-C24-H24C</b> | 109.5    |
| <b>H24B-C24-H24C</b> | 109.5    | <b>C28-C27-C26</b>   | 120.2(5) |
| <b>C28-C27-H27</b>   | 119.9    | <b>C26-C27-H27</b>   | 119.9    |
| <b>C27-C28-C29</b>   | 120.3(4) | <b>C27-C28-C31</b>   | 118.7(5) |
| <b>C29-C28-C31</b>   | 121.0(5) | <b>O12-C32-H32A</b>  | 109.5    |
| <b>O12-C32-H32B</b>  | 109.5    | <b>H32A-C32-H32B</b> | 109.5    |
| <b>O12-C32-H32C</b>  | 109.5    | <b>H32A-C32-H32C</b> | 109.5    |
| <b>H32B-C32-H32C</b> | 109.5    | <b>C25-C26-C27</b>   | 119.1(5) |
| <b>C25-C26-H26</b>   | 120.4    | <b>C27-C26-H26</b>   | 120.4    |
| <b>O11-C31-C28</b>   | 126.1(6) | <b>O11-C31-H31</b>   | 117.0    |
| <b>C28-C31-H31</b>   | 117.0    | <b>O2-C7-C4</b>      | 125.0(6) |
| <b>O2-C7-H7A</b>     | 117.5    | <b>C4-C7-H7A</b>     | 117.5    |
| <b>O3-C8-H8A</b>     | 109.5    | <b>O3-C8-H8B</b>     | 109.5    |
| <b>H8A-C8-H8B</b>    | 109.5    | <b>O3-C8-H8C</b>     | 109.5    |
| <b>H8A-C8-H8C</b>    | 109.5    | <b>H8B-C8-H8C</b>    | 109.5    |

**Table S11: Torsion angles (°)**

|                        |           |                        |           |
|------------------------|-----------|------------------------|-----------|
| <b>C24-O9-C22-C21</b>  | 1.7(7)    | <b>C24-O9-C22-C17</b>  | -178.6(5) |
| <b>O9-C22-C21-C20</b>  | -179.1(5) | <b>C17-C22-C21-C20</b> | 1.3(8)    |
| <b>C14-C13-C12-C11</b> | -0.5(7)   | <b>C14-C13-C12-C15</b> | 175.7(4)  |
| <b>O4-C9-C10-C11</b>   | 179.0(5)  | <b>C14-C9-C10-C11</b>  | -1.1(8)   |
| <b>C32-O12-C30-C29</b> | 2.9(8)    | <b>C32-O12-C30-C25</b> | -175.6(5) |
| <b>C16-O6-C14-C13</b>  | -3.4(7)   | <b>C16-O6-C14-C9</b>   | 177.9(5)  |
| <b>C12-C13-C14-O6</b>  | 179.6(4)  | <b>C12-C13-C14-C9</b>  | -1.8(8)   |
| <b>O4-C9-C14-O6</b>    | 1.3(7)    | <b>C10-C9-C14-O6</b>   | -178.7(5) |
| <b>O4-C9-C14-C13</b>   | -177.5(5) | <b>C10-C9-C14-C13</b>  | 2.6(8)    |
| <b>C11-C12-C15-O5</b>  | 170.5(5)  | <b>C13-C12-C15-O5</b>  | -5.6(8)   |
| <b>C29-C30-C25-O10</b> | -179.5(5) | <b>O12-C30-C25-O10</b> | -0.9(7)   |
| <b>C29-C30-C25-C26</b> | -0.4(8)   | <b>O12-C30-C25-C26</b> | 178.2(5)  |

|                 |           |                 |           |
|-----------------|-----------|-----------------|-----------|
| C8-O3-C6-C5     | 2.0(7)    | C8-O3-C6-C1     | -178.9(5) |
| C22-C21-C20-C19 | 1.0(8)    | C22-C21-C20-C23 | -175.5(5) |
| C21-C22-C17-O7  | 177.9(5)  | O9-C22-C17-O7   | -1.9(7)   |
| C21-C22-C17-C18 | -2.9(8)   | O9-C22-C17-C18  | 177.4(5)  |
| C19-C20-C23-O8  | -173.1(6) | C21-C20-C23-O8  | 3.4(9)    |
| C3-C2-C1-O1     | 179.6(5)  | C3-C2-C1-C6     | 0.1(8)    |
| O3-C6-C1-O1     | 0.9(7)    | C5-C6-C1-O1     | -179.9(5) |
| O3-C6-C1-C2     | -179.7(5) | C5-C6-C1-C2     | -0.5(8)   |
| O3-C6-C5-C4     | 179.7(5)  | C1-C6-C5-C4     | 0.5(7)    |
| C21-C20-C19-C18 | -1.6(8)   | C23-C20-C19-C18 | 175.1(5)  |
| C6-C5-C4-C3     | -0.3(8)   | C6-C5-C4-C7     | -179.4(5) |
| C1-C2-C3-C4     | 0.1(8)    | C5-C4-C3-C2     | 0.0(8)    |
| C7-C4-C3-C2     | 179.1(5)  | C13-C12-C11-C10 | 2.0(8)    |
| C15-C12-C11-C10 | -174.1(5) | C9-C10-C11-C12  | -1.2(8)   |
| O7-C17-C18-C19  | -178.4(5) | C22-C17-C18-C19 | 2.3(8)    |
| C20-C19-C18-C17 | -0.1(8)   | O12-C30-C29-C28 | -178.6(5) |
| C25-C30-C29-C28 | -0.2(8)   | C26-C27-C28-C29 | 0.1(9)    |
| C26-C27-C28-C31 | -180.0(5) | C30-C29-C28-C27 | 0.4(8)    |
| C30-C29-C28-C31 | -179.5(5) | O10-C25-C26-C27 | 180.0(5)  |
| C30-C25-C26-C27 | 0.9(8)    | C28-C27-C26-C25 | -0.7(9)   |
| C27-C28-C31-O11 | 177.4(6)  | C29-C28-C31-O11 | -2.7(10)  |
| C5-C4-C7-O2     | 0.7(10)   | C3-C4-C7-O2     | -178.4(6) |

**Table S12: Anisotropic atomic displacement parameters (Å<sup>2</sup>)**

The anisotropic atomic displacement factor exponent takes the form:  $-2\pi^2 [ h^2 a^{*2} U_{11} + \dots + 2 h k a^* b^* U_{12} ]$

|            | <b>U<sub>11</sub></b> | <b>U<sub>22</sub></b> | <b>U<sub>33</sub></b> | <b>U<sub>23</sub></b> | <b>U<sub>13</sub></b> | <b>U<sub>12</sub></b> |
|------------|-----------------------|-----------------------|-----------------------|-----------------------|-----------------------|-----------------------|
| <b>O9</b>  | 0.0278(18)            | 0.075(3)              | 0.041(2)              | 0.015(2)              | -0.0055(16)           | -0.001(2)             |
| <b>O12</b> | 0.035(2)              | 0.083(3)              | 0.044(2)              | -0.009(2)             | -0.0012(17)           | -0.012(2)             |
| <b>O3</b>  | 0.038(2)              | 0.070(3)              | 0.041(2)              | -0.003(2)             | 0.0001(17)            | 0.010(2)              |
| <b>O5</b>  | 0.029(2)              | 0.084(3)              | 0.049(2)              | 0.013(2)              | 0.0050(18)            | -0.005(2)             |
| <b>O6</b>  | 0.0303(18)            | 0.076(3)              | 0.035(2)              | 0.0135(19)            | -0.0026(16)           | 0.008(2)              |
| <b>O8</b>  | 0.030(2)              | 0.095(3)              | 0.050(2)              | 0.014(3)              | 0.0019(18)            | -0.009(2)             |
| <b>O7</b>  | 0.029(2)              | 0.084(3)              | 0.047(3)              | 0.012(2)              | 0.0040(17)            | -0.003(2)             |
| <b>O10</b> | 0.039(2)              | 0.096(3)              | 0.038(2)              | -0.019(2)             | 0.0012(17)            | -0.015(2)             |
| <b>O1</b>  | 0.044(2)              | 0.090(3)              | 0.036(2)              | 0.008(2)              | -0.0033(17)           | 0.008(2)              |
| <b>O4</b>  | 0.026(2)              | 0.094(4)              | 0.046(2)              | 0.015(2)              | 0.0063(18)            | -0.002(2)             |
| <b>O11</b> | 0.090(3)              | 0.100(4)              | 0.043(2)              | -0.019(2)             | 0.003(2)              | 0.004(3)              |
| <b>C22</b> | 0.034(3)              | 0.039(3)              | 0.027(3)              | 0.005(3)              | -0.004(2)             | 0.004(3)              |
| <b>C9</b>  | 0.025(3)              | 0.047(4)              | 0.034(3)              | -0.002(3)             | 0.000(2)              | 0.000(3)              |
| <b>C13</b> | 0.033(3)              | 0.042(4)              | 0.034(3)              | 0.002(3)              | 0.003(2)              | 0.000(3)              |
| <b>C21</b> | 0.026(3)              | 0.041(3)              | 0.033(3)              | 0.005(3)              | 0.003(2)              | -0.002(3)             |
| <b>C12</b> | 0.027(3)              | 0.036(3)              | 0.034(3)              | -0.004(3)             | -0.001(2)             | -0.001(2)             |
| <b>C10</b> | 0.033(3)              | 0.057(4)              | 0.036(3)              | 0.013(3)              | 0.005(2)              | 0.001(3)              |
| <b>C30</b> | 0.038(3)              | 0.045(4)              | 0.035(3)              | 0.004(3)              | 0.002(2)              | 0.000(3)              |
| <b>C14</b> | 0.023(3)              | 0.042(3)              | 0.031(3)              | -0.002(3)             | -0.002(2)             | 0.002(2)              |
| <b>C15</b> | 0.027(3)              | 0.052(4)              | 0.041(3)              | -0.011(3)             | -0.006(3)             | 0.003(3)              |
| <b>C25</b> | 0.039(3)              | 0.050(4)              | 0.035(3)              | -0.001(3)             | -0.009(3)             | 0.002(3)              |

|     | $U_{11}$ | $U_{22}$ | $U_{33}$ | $U_{23}$  | $U_{13}$  | $U_{12}$  |
|-----|----------|----------|----------|-----------|-----------|-----------|
| C2  | 0.037(3) | 0.055(4) | 0.036(3) | 0.004(3)  | -0.003(2) | -0.001(3) |
| C6  | 0.036(3) | 0.043(4) | 0.037(3) | -0.004(3) | 0.000(2)  | -0.002(3) |
| O2  | 0.086(3) | 0.121(5) | 0.050(3) | 0.022(3)  | 0.009(2)  | 0.022(3)  |
| C20 | 0.025(3) | 0.041(4) | 0.035(3) | 0.003(2)  | -0.001(2) | 0.002(2)  |
| C17 | 0.024(3) | 0.048(4) | 0.036(3) | -0.003(3) | 0.002(2)  | 0.000(3)  |
| C23 | 0.036(3) | 0.054(4) | 0.039(3) | 0.001(3)  | -0.006(3) | 0.010(3)  |
| C1  | 0.037(3) | 0.051(4) | 0.029(3) | -0.004(3) | -0.001(2) | -0.007(3) |
| C5  | 0.041(3) | 0.048(4) | 0.036(3) | 0.000(3)  | -0.005(3) | -0.002(3) |
| C19 | 0.037(3) | 0.056(4) | 0.032(3) | 0.010(3)  | -0.007(2) | 0.004(3)  |
| C4  | 0.045(3) | 0.045(4) | 0.037(3) | -0.001(3) | -0.001(3) | -0.005(3) |
| C3  | 0.035(3) | 0.050(4) | 0.046(3) | -0.004(3) | 0.002(3)  | -0.002(3) |
| C11 | 0.037(3) | 0.053(4) | 0.032(3) | 0.001(3)  | -0.006(2) | 0.004(3)  |
| C18 | 0.040(3) | 0.058(4) | 0.025(3) | 0.011(3)  | 0.000(2)  | -0.001(3) |
| C16 | 0.047(3) | 0.056(4) | 0.032(3) | 0.011(3)  | -0.004(2) | 0.004(3)  |
| C29 | 0.046(3) | 0.049(4) | 0.031(3) | -0.001(3) | -0.009(2) | 0.001(3)  |
| C24 | 0.047(3) | 0.063(4) | 0.037(3) | 0.008(3)  | -0.013(3) | -0.004(3) |
| C27 | 0.036(3) | 0.063(4) | 0.050(4) | 0.002(3)  | 0.013(3)  | 0.009(3)  |
| C28 | 0.046(3) | 0.049(4) | 0.034(3) | 0.000(3)  | 0.003(3)  | 0.011(3)  |
| C32 | 0.041(3) | 0.071(5) | 0.059(3) | -0.014(3) | 0.001(3)  | -0.019(3) |
| C26 | 0.033(3) | 0.072(4) | 0.043(3) | -0.009(3) | -0.003(3) | -0.004(3) |
| C31 | 0.071(4) | 0.075(5) | 0.046(4) | -0.005(4) | 0.007(3)  | 0.015(4)  |
| C7  | 0.058(4) | 0.072(5) | 0.047(4) | 0.008(3)  | 0.010(3)  | 0.001(4)  |
| C8  | 0.047(4) | 0.072(5) | 0.056(4) | 0.004(3)  | -0.001(3) | 0.022(3)  |

**Table S13: Hydrogen atomic coordinates and isotropic atomic displacement parameters ( $\text{\AA}^2$ )**

|      | x/a    | y/b     | z/c    | U(eq) |
|------|--------|---------|--------|-------|
| H7   | 0.1050 | 0.0561  | 0.5699 | 0.08  |
| H10  | 0.0650 | -0.0275 | 0.6251 | 0.086 |
| H1   | 0.6648 | 0.0333  | 0.3778 | 0.085 |
| H4   | 0.6191 | 0.9499  | 0.4340 | 0.083 |
| H13  | 0.3768 | 0.7332  | 0.4682 | 0.043 |
| H21  | 0.3461 | 0.2886  | 0.5352 | 0.04  |
| H10A | 0.4871 | 1.2344  | 0.3856 | 0.051 |
| H15  | 0.2287 | 1.0103  | 0.4170 | 0.048 |
| H2   | 0.8355 | -0.2074 | 0.3463 | 0.051 |
| H23  | 0.4945 | 0.0358  | 0.5877 | 0.052 |
| H5   | 0.6473 | 0.3183  | 0.2860 | 0.05  |
| H19  | 0.3784 | -0.1691 | 0.6127 | 0.05  |
| H3   | 0.8652 | -0.1264 | 0.2973 | 0.053 |
| H11  | 0.3479 | 1.1993  | 0.3910 | 0.049 |
| H18  | 0.2398 | -0.2326 | 0.6176 | 0.049 |
| H16A | 0.4778 | 0.7878  | 0.5054 | 0.068 |
| H16B | 0.5559 | 0.5571  | 0.5072 | 0.068 |
| H16C | 0.4777 | 0.4195  | 0.4915 | 0.068 |
| H29  | 0.1136 | 0.3658  | 0.7128 | 0.05  |

|             | <b>x/a</b> | <b>y/b</b> | <b>z/c</b> | <b>U(eq)</b> |
|-------------|------------|------------|------------|--------------|
| <b>H24A</b> | 0.2457     | 0.5873     | 0.5121     | 0.073        |
| <b>H24B</b> | 0.1674     | 0.4527     | 0.4962     | 0.073        |
| <b>H24C</b> | 0.2456     | 0.2224     | 0.4975     | 0.073        |
| <b>H27</b>  | -0.1197    | 0.0632     | 0.7106     | 0.06         |
| <b>H32A</b> | 0.2116     | 0.5275     | 0.6799     | 0.085        |
| <b>H32B</b> | 0.2658     | 0.2996     | 0.6595     | 0.085        |
| <b>H32C</b> | 0.2336     | 0.1503     | 0.6891     | 0.085        |
| <b>H26</b>  | -0.1029    | -0.1240    | 0.6629     | 0.059        |
| <b>H31</b>  | -0.0697    | 0.3230     | 0.7538     | 0.077        |
| <b>H7A</b>  | 0.8299     | 0.0768     | 0.2499     | 0.071        |
| <b>H8A</b>  | 0.5552     | 0.6229     | 0.3154     | 0.088        |
| <b>H8B</b>  | 0.4889     | 0.4656     | 0.3360     | 0.088        |
| <b>H8C</b>  | 0.5184     | 0.2598     | 0.3086     | 0.088        |
